# Supplementary material for: Diet Is Associated with Frailty in Lung Cancer: A Possible Role of Gut Microbiota
Source: MDPI journal article supplement (doi:10.3390/nu15194298), 2023-10-09
Supplement: s1 [file s1]

**Table S1.** Univariate logistic regression analysis of nutrients factors influencing frailty in the lung cancer patients ( $n = 231$ ).

| <b>Variables</b> | <b>OR</b> | <b>95% CI</b> | <b><i>p</i>-Value</b> |
|------------------|-----------|---------------|-----------------------|
| Energy           | 0.99      | 0.98, 0.99    | < 0.001               |
| Protein          | 0.97      | 0.96, 0.99    | < 0.001               |
| Carbohydrate     | 0.99      | 0.98, 0.99    | < 0.001               |
| Dietary fiber    | 0.90      | 0.83, 0.97    | 0.004                 |
| Vitamin A        | 1.00      | 0.99, 1.00    | 0.986                 |
| Vitamin B1       | 1.01      | 0.97, 1.04    | 0.682                 |
| Vitamin B2       | 0.90      | 0.67, 1.21    | 0.503                 |
| Vitamin B6       | 1.00      | 0.99, 1.01    | 0.906                 |
| Vitamin C        | 0.99      | 0.99, 1.00    | 0.064                 |
| Niacin           | 0.90      | 0.84, 0.96    | 0.002                 |
| Calcium          | 0.99      | 0.99, 0.99    | < 0.001               |
| Phosphorus       | 0.99      | 0.99, 0.99    | < 0.001               |
| Potassium        | 0.99      | 0.99, 0.99    | < 0.001               |
| Magnesium        | 0.99      | 0.98, 0.99    | < 0.001               |
| Iron             | 0.97      | 0.92, 1.02    | 0.194                 |
| Zinc             | 0.81      | 0.72, 0.92    | < 0.001               |
| Iodine           | 0.97      | 0.95, 0.99    | 0.017                 |
| Selenium         | 0.99      | 0.98, 0.99    | 0.026                 |
| Copper           | 0.71      | 0.51, 0.98    | 0.035                 |
| Manganese        | 0.78      | 0.64, 0.95    | 0.013                 |
